# Supplementary figures and images for: Rapid determination of protein stability and ligand binding by differential scanning fluorimetry of GFP-tagged proteins
Source: Royal Society of Chemistry journal article supplement (doi:10.1039/c2ra22368f), 2012-01-01

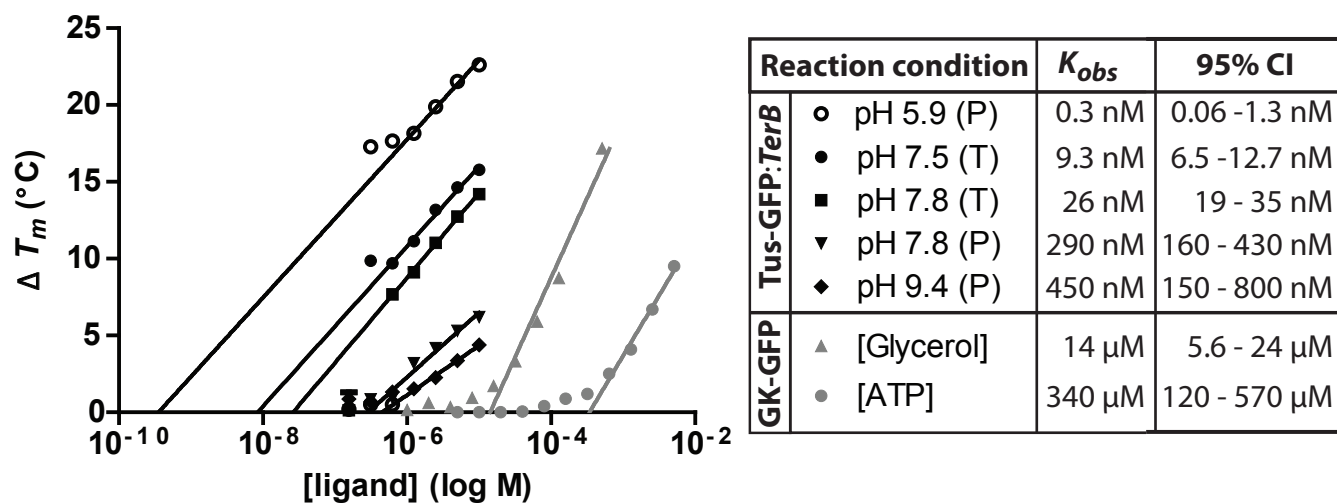

Figure S1

Supplement: c2ra22368f.pdf [file c2ra22368f.pdf]
